# Supplementary material for: The structure of the RCAN1:CN complex explains the inhibition of and substrate recruitment by calcineurin
Source: PubMed Central journal article supplement — Sci Adv. 2020 Jul 1;6(27):eaba3681. doi: 10.1126/sciadv.aba3681 (PMC7458460; doi:10.1126/sciadv.aba3681), 2020-07-01
Supplement: aba3681_SM.pdf [file aba3681_SM.pdf]

[advances.sciencemag.org/cgi/content/full/6/27/eaba3681/DC1](https://advances.sciencemag.org/cgi/content/full/6/27/eaba3681/DC1)

## Supplementary Materials for

### **The structure of the RCAN1:CN complex explains the inhibition of and substrate recruitment by calcineurin**

Yang Li, Sarah R. Sheftic, Simina Grigoriu, Charles D. Schwieters, Rebecca Page, Wolfgang Peti\*

\*Corresponding author. Email: [wolfgangpeti@email.arizona.edu](mailto:wolfgangpeti@email.arizona.edu)

Published 1 July 2020, *Sci. Adv.* **6**, eaba3681 (2020)

DOI: [10.1126/sciadv.aba3681](https://doi.org/10.1126/sciadv.aba3681)

#### **This PDF file includes:**

Tables S1 to S4

Figs. S1 to S4

**Table S1: Surface plasmon resonance (SPR) spectroscopy**

| <b>Ligand</b>                                | <b>Analyte</b>    | <b>K<sub>D</sub> (nM)</b> | <b>k<sub>on</sub> (M<sup>-1</sup>s<sup>-1</sup> x 10<sup>6</sup>)</b> | <b>k<sub>off</sub> (s<sup>-1</sup> x 10<sup>-3</sup>)</b> |
|----------------------------------------------|-------------------|---------------------------|-----------------------------------------------------------------------|-----------------------------------------------------------|
| RCAN1 <sub>89-197</sub>                      | CN <sub>391</sub> | 0.5 ± 0.1                 | 2.5 ± 0.3                                                             | 1.4 ± 0.3                                                 |
| RCAN1 <sub>89-197</sub> LxVP <sub>dead</sub> | CN <sub>391</sub> | 0.8 ± 0.2                 | 2.7 ± 0.1                                                             | 2.0 ± 0.4                                                 |
| RCAN1 <sub>89-197</sub> TxxP <sub>dead</sub> | CN <sub>391</sub> | 3.0 ± 0.1                 | 1.7 ± 0.4                                                             | 5.3 ± 1.3                                                 |

**Table S2. Data collection and refinement statistics for the CNA:RCAN1<sub>core</sub> complex**<sup>a</sup>Data was collected from a single crystal

\*Values in parentheses are for highest-resolution shell.

| <b>CNA:RCAN1<sub>core</sub></b>                      |                                               |
|------------------------------------------------------|-----------------------------------------------|
| PDBID                                                | 6UUQ                                          |
| Beamline                                             | APS 23ID-B (GM/CA)                            |
| Wavelength (Å)                                       | 1.03320                                       |
| <b>Data collection</b>                               |                                               |
| Space group                                          | P2 <sub>1</sub> 2 <sub>1</sub> 2 <sub>1</sub> |
| Cell dimensions                                      |                                               |
| <i>a</i> , <i>b</i> , <i>c</i> (Å)                   | 57.8, 71.2, 92.0                              |
| $\alpha$ , $\beta$ , $\gamma$ (°)                    | 90, 90, 90                                    |
| Resolution (Å)                                       | 50.00-1.85 (1.88-1.85)                        |
| <i>R</i> <sub>sym</sub> or <i>R</i> <sub>merge</sub> | 0.175 (0.936)                                 |
| <i>I</i> / $\sigma$ <i>I</i>                         | 24.4 (2.5)                                    |
| CC 1/2                                               | 0.996 (0.749)                                 |
| Completeness (%)                                     | 99.9 (99.9)                                   |
| Redundancy                                           | 4.9 (4.8)                                     |
| <b>Refinement</b>                                    |                                               |
| Resolution (Å)                                       | 29.87-2.70 (2.77-2.70)                        |
| No. reflections                                      | 40847                                         |
| <i>R</i> <sub>work</sub> / <i>R</i> <sub>free</sub>  | 0.20 (0.33)/0.25 (0.37)                       |
| No. atoms                                            |                                               |
| Protein                                              | 9351                                          |
| Ligand/ion                                           | 77                                            |
| Water                                                | 52                                            |
| <i>B</i> -factors                                    |                                               |
| Protein                                              | 61.79                                         |
| Ligand/ion                                           | 77.12                                         |
| Water                                                | 46.16                                         |
| R.m.s. deviations                                    |                                               |
| Bond lengths (Å)                                     | 0.006                                         |
| Bond angles (°)                                      | 0.771                                         |
| Ramachandran                                         |                                               |
| Outliers (%)                                         | 0.35                                          |
| Allowed (%)                                          | 8.36                                          |
| Favored (%)                                          | 91.30                                         |
| Rotamer Outliers                                     | 2.48                                          |
| Clashscore                                           | 5.39                                          |

**Table S3: Catalytic efficiency of CN**

| <b>RCAN1 variant</b>                                     | <b><math>k_{cat}</math><br/>(<math>\times 10^{-2} \text{s}^{-1}</math>)</b> | <b><math>k_{cat}/K_m</math><br/>(<math>\text{M}^{-1} \text{s}^{-1}</math>)</b> |
|----------------------------------------------------------|-----------------------------------------------------------------------------|--------------------------------------------------------------------------------|
| none                                                     | $38.5 \pm 0.2$                                                              | $37.1 \pm 0.9$                                                                 |
| WT                                                       | $1.5 \pm 0.1$                                                               | $2.7 \pm 0.8$                                                                  |
| LxVP <sub>dead</sub>                                     | $1.8 \pm 0.1$                                                               | $5.5 \pm 1.3$                                                                  |
| PxlxlT <sub>dead</sub>                                   | $44.8 \pm 0.1$                                                              | $11.1 \pm 1.0$                                                                 |
| <sup>108</sup> SPP <sub>dead</sub>                       | $6.0 \pm 0.8$                                                               | $1.1 \pm 0.3$                                                                  |
| <sup>108</sup> SPP <sub>dead</sub> /TxxP <sub>dead</sub> | $38.0 \pm 0.3$                                                              | $31.4 \pm 0.8$                                                                 |
| <sup>112</sup> SPP <sub>dead</sub>                       | $4.8 \pm 0.4$                                                               | $0.9 \pm 0.2$                                                                  |
| <sup>112</sup> SPP <sub>dead</sub> /TxxP <sub>dead</sub> | $29.6 \pm 0.2$                                                              | $32.6 \pm 0.9$                                                                 |
| TxxP <sub>mut3</sub> (TRAP)                              | $20.2 \pm 0.2$                                                              | $12.8 \pm 0.5$                                                                 |
| TxxP <sub>mut3</sub> (TAAP)                              | $20.9 \pm 0.2$                                                              | $21.6 \pm 0.7$                                                                 |
| TxxP <sub>mut3</sub> (TAAA)                              | $21.0 \pm 0.1$                                                              | $24.6 \pm 0.6$                                                                 |
| TxxP <sub>dead</sub> (AAAA)                              | $22.2 \pm 0.1$                                                              | $30.0 \pm 0.8$                                                                 |

**Table S4. RCAN1<sub>core</sub> NOE restraints**

| <b>HN – HN NOEs</b>     |                                 |                                             |
|-------------------------|---------------------------------|---------------------------------------------|
| Tyr 129 HN – Leu 131 HN | Tyr 133 HN – Ser 136 HN         | Ile 158 HN – Val 157 Hy                     |
| Asp 130 HN – Leu 131 HN | His 147 HN – Val 156 HN         | Thr 159 HN – Val 160 Hy                     |
| Tyr 133 HN – Ala 134 HN | Leu 132 HN – Ile 135 HN         | Thr 159 HN – Val 157 Hy1                    |
| Ser 136 HN – Lys 137 HN | Leu 131 HN – Ala 7 HN           | Thr 159 HN – Ile 158 Hδ                     |
| Ser 136 HN – Leu 138 HN | Thr 150 HN – Thr 153 HN         | Cys 161 HN – Val 160 Hy1                    |
| Leu 138 HN – Gly 139 HN | Val 156 HN – Val 157 HN         | Cys 161 HN – Val 160 Hy2                    |
| Gly 141 HN – Glu 142 HN | Val 157 HN – Ile 158 HN         | Glu 162 HN – Val 160 Hy1                    |
| Glu 142 HN – Lys 143 HN | Glu 145 HN – Leu 146 HN         | <b>CH<sub>3</sub> – CH<sub>3</sub> NOEs</b> |
| Tyr 144 HN – Glu 145 HN | <b>HN – CH<sub>3</sub> NOEs</b> | Leu 131 Hδ1– Ile 135 Hδ                     |
| Leu 146 HN – His 147 HN | Leu 131 HN – Val 156 Hy         | Leu 131 Hδ2– Ile 135 Hδ                     |
| Ala 148 HN – Ala 149 HN | Tyr 133 HN – Val 156 Hy1        | Leu 132 Hδ1– Ile 135 Hδ                     |
| Ala 149 HN – Thr 150 HN | Tyr 133 HN – Val 156 Hy2        | Leu 132 Hδ1– Leu 138 Hδ1                    |
| Thr 150 HN – Asp 151 HN | Lys 137 HN – Leu 138 Hδ1        | Ile 135 Hδ – Ile 158 Hδ                     |
| Asp 151 HN – Thr 152 HN | Gly 139 HN – Leu 138 Hδ1        | Leu 146 Hδ2– Leu 131 Hδ1                    |
| Asp 151 HN – Thr 153 HN | Gly 139 HN – Leu 138 Hδ2        | Ile 158 Hδ – Val 160 Hy1                    |
| Thr 152 HN – Thr 153 HN | Gly 139 HN – Val 156 Hy1        | Ile 158 Hδ – Val 160 Hy2                    |
| Ser 155 HN – Val 156 HN | Gly 141 HN – Val 160 Hy1        | Ile 158 Hδ – Val 157 Hy1                    |
| Ile 158 HN – Thr 159 HN | Gly 141 HN – Val 160 Hy2        | Ile 158 Hδ – Val 156 Hy1                    |
| Thr 159 HN – Val 160 HN | Glu 142 HN – Val 160 Hy1        | Ile 158 Hδ – Val 156 Hy2                    |
| Val 160 HN – Cys 161 HN | Glu 142 HN – Val 160 Hy2        |                                             |
| Cys 161 HN – Glu 162 HN | Lys 143 HN – Leu 138 Hδ1        |                                             |
| Glu 162 HN – Ser 163 HN | Lys 143 HN – Leu 138 Hδ2        |                                             |
| Ser 163 HN – Asp 164 HN | Tyr 144 HN – Leu 138 Hδ1        |                                             |
| Leu 131 HN – Thr 150 HN | Tyr 144 HN – Leu 138 Hδ2        |                                             |
| Asp 130 HN – Ala 148 HN | Tyr 144 HN – Ile 158 Hδ         |                                             |
| Ile 135 HN – Ala 148 HN | Glu 145 HN – Leu 146 Hδ1        |                                             |
| Gly 139 HN – Glu 142 HN | His 147 HN – Leu 146 Hδ1        |                                             |
| Glu 142 HN – Val 160 HN | His 147 HN – Leu 146 Hδ2        |                                             |
| Lys 143 HN – Val 160 HN | His 147 HN – Val 156 Hy1        |                                             |
| Tyr 144 HN – Ile 158 HN | Ser 155 HN – Val 157 Hy1        |                                             |
| Glu 145 HN – Ile 158 HN | Ser 155 HN – Val 157 Hy2        |                                             |
| Leu 146 HN – Val 156 HN | Ser 155 HN – Val 156 Hy1        |                                             |
| His 147 HN – Asp 151 HN | Ser 155 HN – Val 156 Hy2        |                                             |
|                         | Val 157 HN – Val 156 Hy         |                                             |

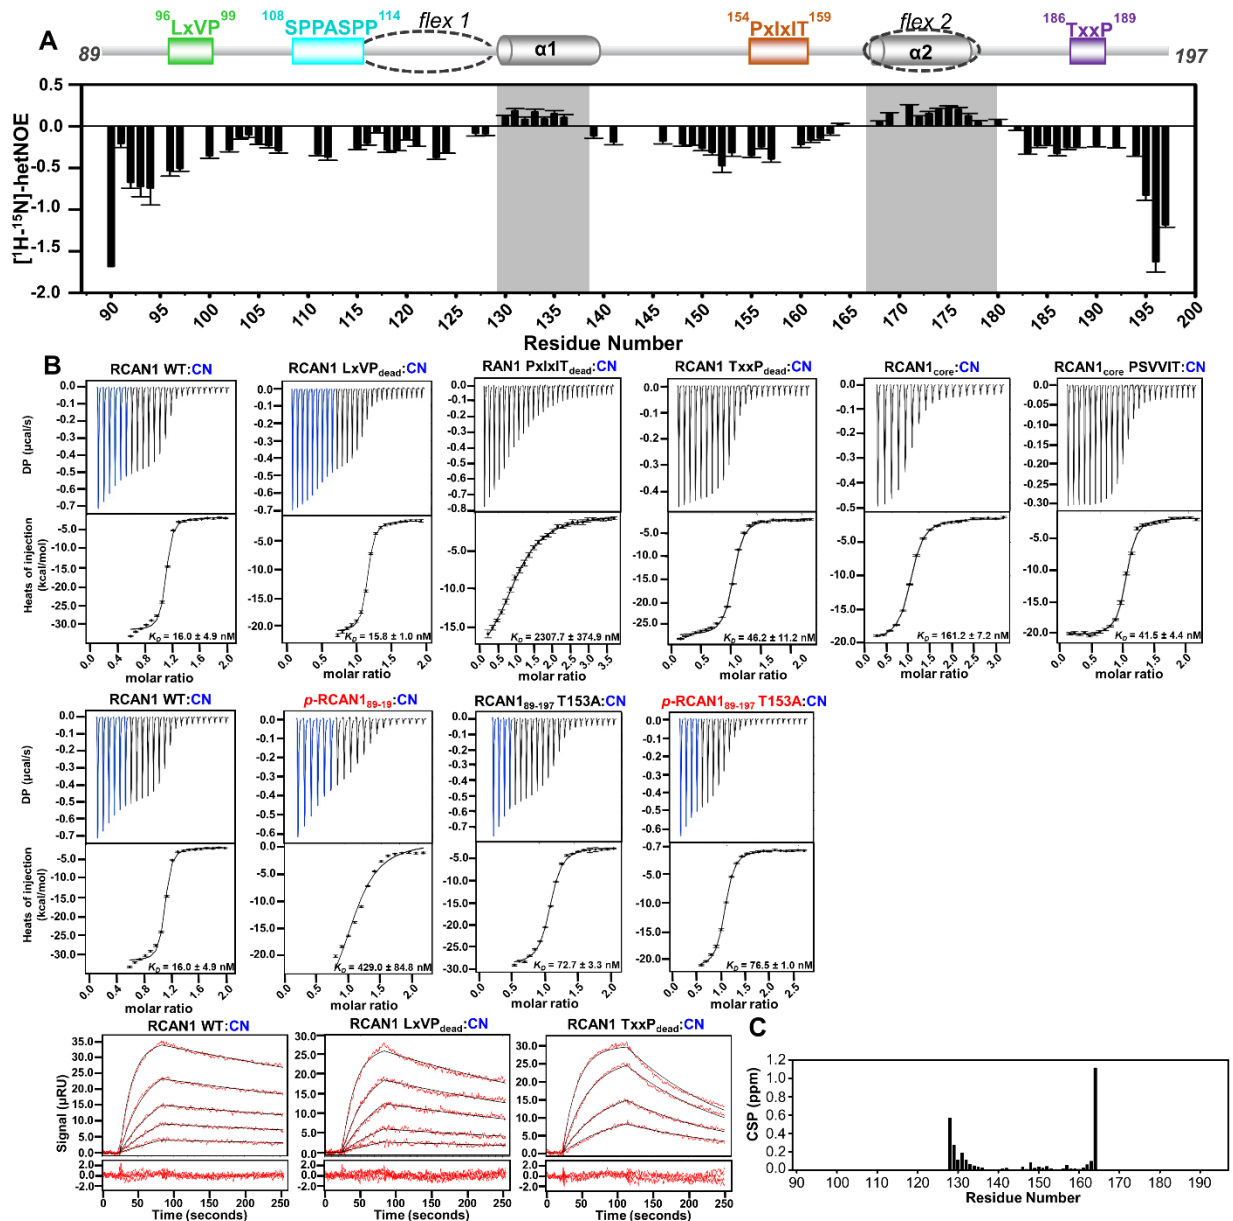

**Figure S1. Properties of free RCAN1 and the RCAN1 interaction with CN.** **A.**  $^1\text{H-}^{15}\text{N}$  heteronuclear NOE (hetNOE) of RCAN1. Gray boxes highlight the two partially populated helices. **B.** Top: ITC data for CN titrated with RCAN1 WT ( $n=3$ ), LxVP<sub>dead</sub> ( $n=3$ ), PxlxlT<sub>dead</sub> ( $n=3$ ), TxxP<sub>dead</sub> ( $n=2$ ), RCAN1<sub>core</sub> ( $n=3$ ), RCAN1<sub>core</sub> PSVVIT ( $n=3$ ), phosphorylated RCAN1 ( $n=2$ ), T153A ( $n=2$ ) and phosphorylated T153A ( $n=2$ ). RCAN1 constructs (especially those including the TxxP motif) have atypical thermograms; black injections points were used to calculate  $K_D$ ; blue injections were not used. Bottom: SPR measurements of immobilized CN with 1.25, 2.5, 5.0, 10, 20  $\mu\text{M}$  of RCAN1 ( $n=6$ ), LxVP<sub>dead</sub> ( $n=6$ ), and 2.5, 5.0, 10, 20  $\mu\text{M}$  of TxxP<sub>dead</sub> ( $n=6$ ); Global fits are shown. **C.** CSPs between free RCAN1<sub>core</sub> and free RCAN1.

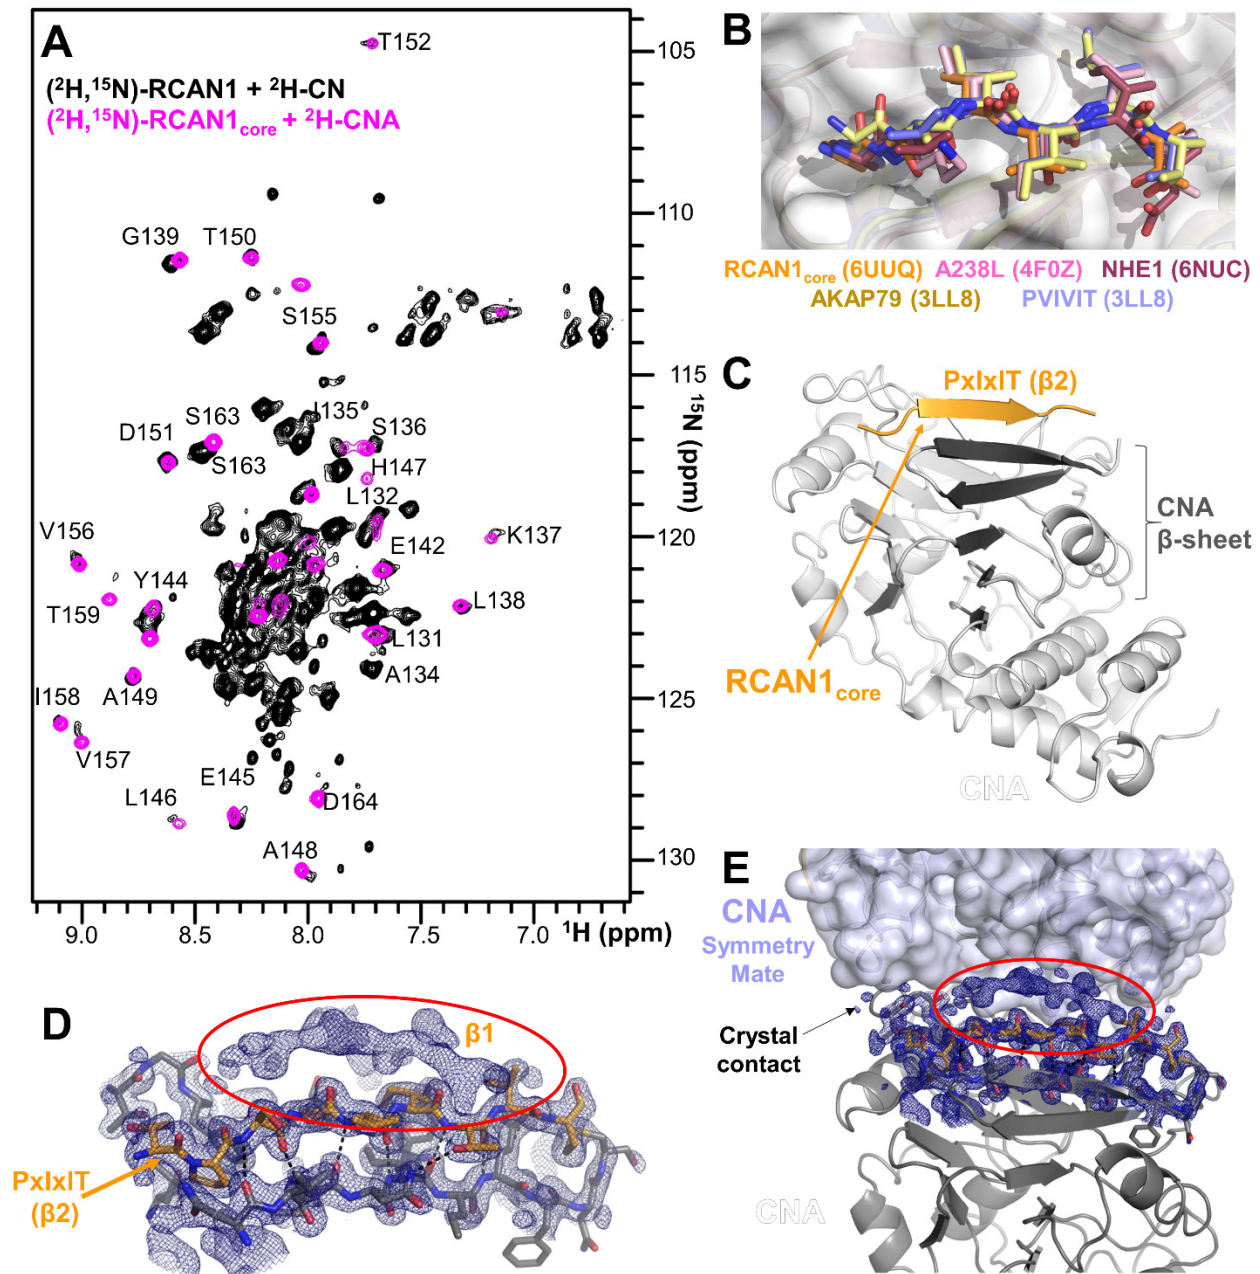

**Figure S2. The structure of the CNA:RCAN1<sub>core</sub> complex.** **A.** Overlay of [<sup>1</sup>H, <sup>15</sup>N] HSQC spectra of 1:1 complexes of RCAN1:CN (black) and RCAN1<sub>core</sub>:CNA (pink). RCAN1<sub>core</sub> residues are indicated. **B.** CN PxlIT motif binding pocket (gray) with PxlIT motifs from RCAN1<sub>core</sub> (orange), A238L (pink), NHE1 (maroon), AKAP79 (dark yellow) and PVIVIT peptide (lavender). **C.** RCAN1 PxlIT motif (orange) interacts with CNA β-strand β14 and extends the CNA β-sheet (black). **D.** 2*mF*<sub>o</sub>-*DF*<sub>c</sub> electron density map (blue; 1σ) of the CNA β-strand β14, RCAN1 PxlIT motif and weak electron density corresponding to RCAN1 β-strand β1. The RCAN1 PxlIT motif β-strand β2 forms 6

hydrogen bonds with CNA  $\beta$ -strand  $\beta$ 14 (black dotted lines). **E.** CNA's RCAN1 binding pocket is located at a crystal contact.



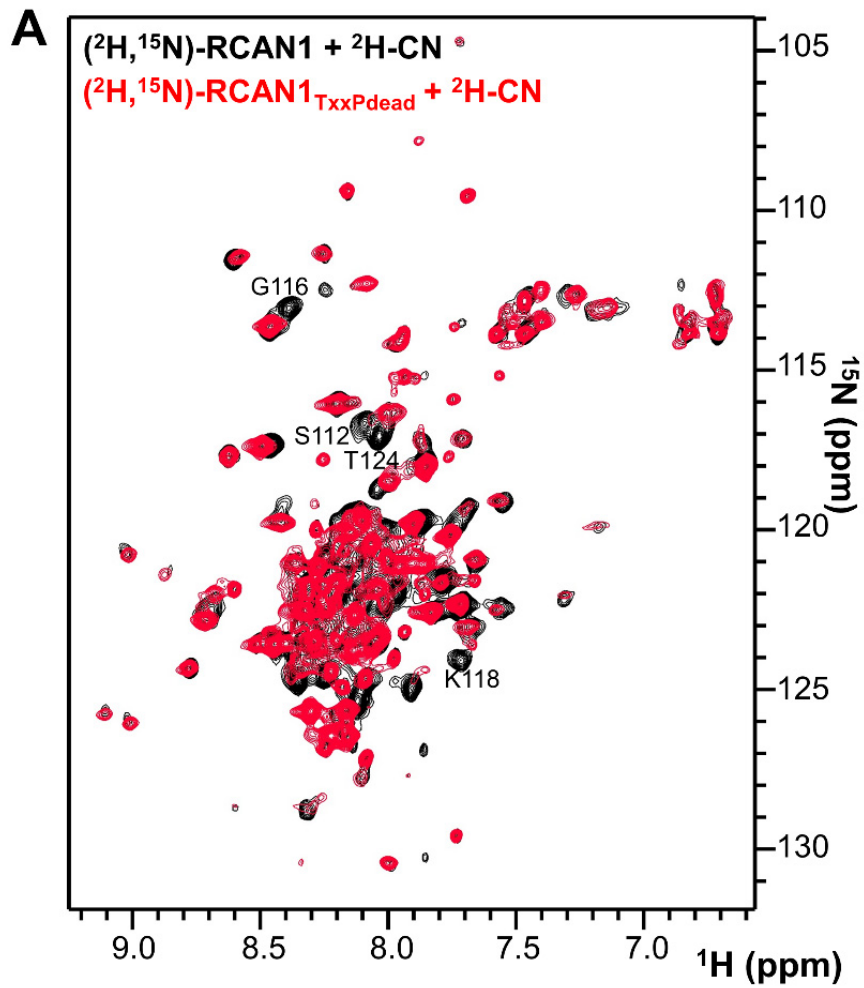

**Figure S3.** The RCAN1 TxxP and  $^{108}\text{SPPASPP}^{114}$  motifs compete for the CN active site. **A.** Overlay of the 2D [ $^1\text{H}, ^{15}\text{N}$ ] TROSY spectra of RCAN1:CN (black) and RCAN1<sub>TxxPdead</sub>:CN (red).

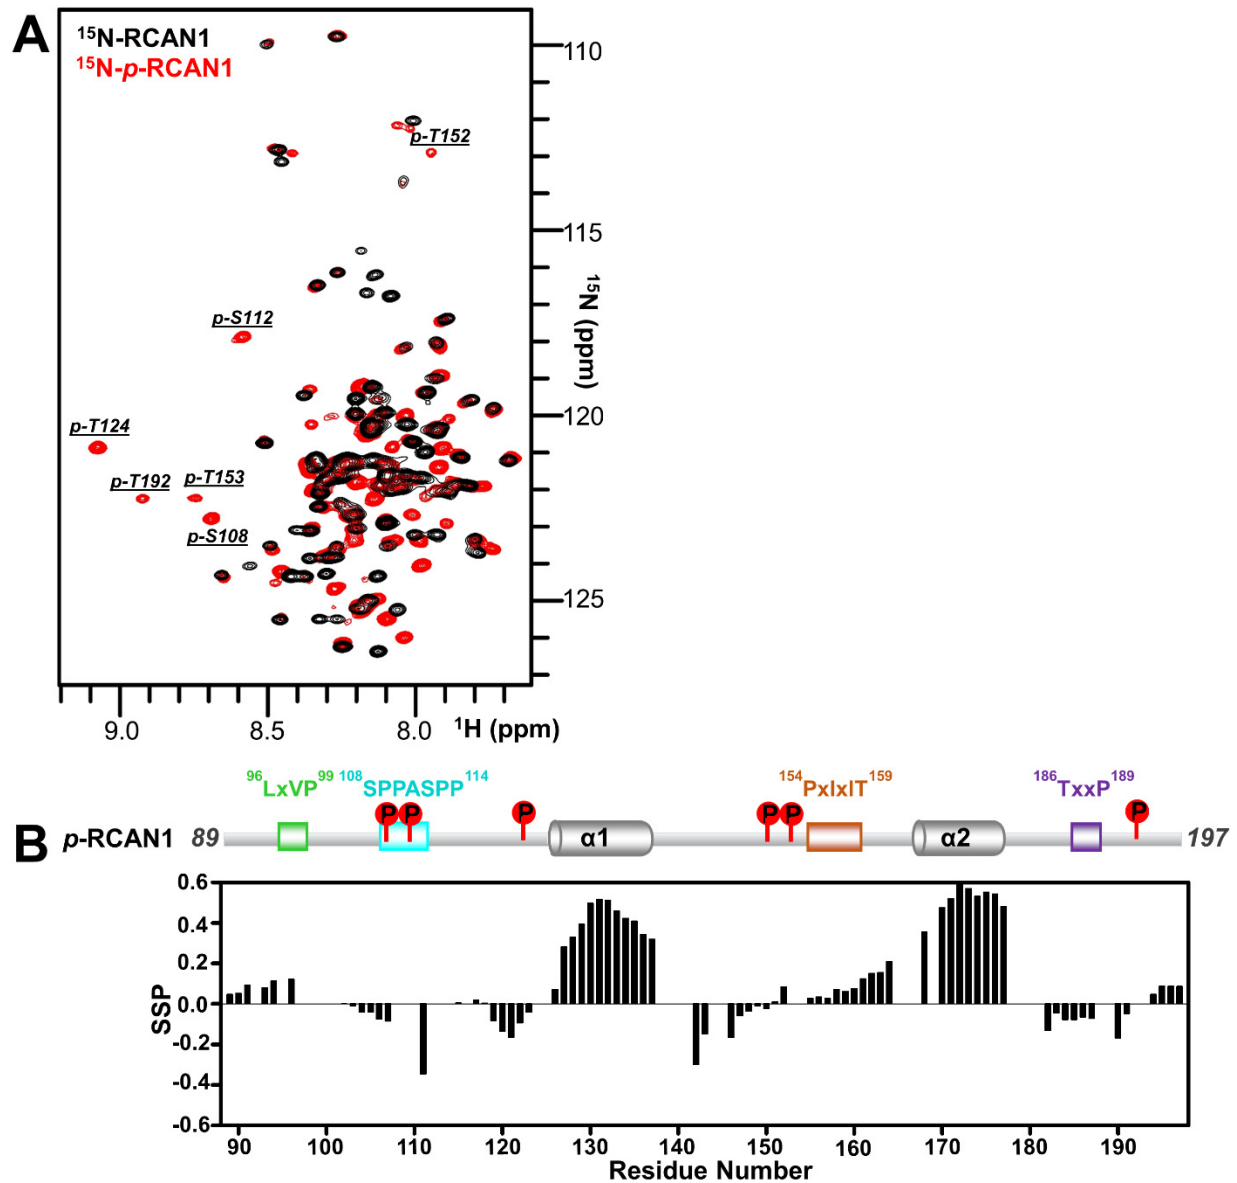

**Figure S4. Phosphorylated RCAN1 retains its secondary structure.** **A.** Overlay of [ $^1\text{H}$ ,  $^{15}\text{N}$ ] HSQC spectra of free RCAN1 (black) and p38-phosphorylated RCAN1 (*p*-RCAN1). Phosphorylated serine and threonine residues are labeled. **B.** Secondary structure propensity (SSP) calculated of *p*-RCAN1. Phosphorylated residues are marked on RCAN1 with red circles.
